# Supplementary material for: An ultrasensitive electrochemical aptasensor for thrombin based on the triplex-amplification of hemin/G-quadruplex horseradish peroxidase-mimicking DNAzyme and horseradish peroxidase decorated FeTe nanorods
Source: Royal Society of Chemistry journal article supplement (doi:10.1039/c2an36772f), 2012-12-20
Supplement: c2an36772f.pdf [file c2an36772f.pdf]

*Supporting information*

**An ultrasensitive electrochemical aptasensor for thrombin based on the triplex-amplification of Hemin/G-quadruplex horseradish peroxidase-mimicking DNzyme and horseradish peroxidase decorated FeTe nanorods**

Liping Jiang, Yaqin Chai<sup>\*</sup>, Ruo Yuan<sup>\*</sup>, Yali Yuan, Lijuan Bai, Yan Wang

*Chongqing Key Laboratory of Analytical Chemistry, College of Chemistry and Chemical Engineering, The Key Laboratory of Eco-environments in Three Gorges Reservoir Region, Southwest University, Chongqing 400715, China*

Fax: +86-23-68253172

E-mail address: yqchai@swu.edu.cn, yuanruo@swu.edu.cn.

***S1. Optimization of the concentration of H<sub>2</sub>O<sub>2</sub> for thrombin detection***

As we know, both signal amplification and noise reduction are critical for sandwich-type electrochemical aptasensors. To obtain the best performance of the aptasensor, concentration of H<sub>2</sub>O<sub>2</sub> was investigated as it may also influence the sensitivity of the aptasensor. After incubated with a fixed concentration of thrombin through sandwich assay, the aptasensor was tested in 0.1 M PBS (pH 7.0) containing H<sub>2</sub>O<sub>2</sub> with different concentrations of 0.5, 1.0, 1.5, 2.0, 2.5 mM. It could be evidently observed that the reduction peak current of proposed aptasensor increased rapidly with increasing the concentration of H<sub>2</sub>O<sub>2</sub> and the current tended to reach at a saturation value when the concentration of H<sub>2</sub>O<sub>2</sub> was higher than 2.0 mM (Fig. S1). Therefore, 2.0 mM H<sub>2</sub>O<sub>2</sub> was adopted in the subsequent work for signal amplification.

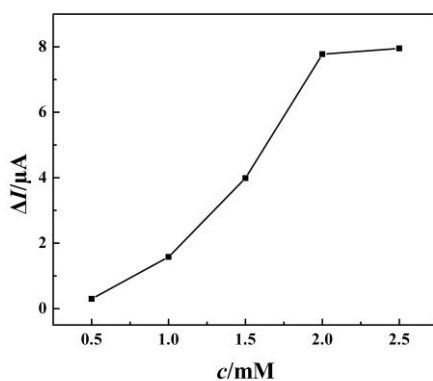

**Fig. S1.** Influence of the concentration of  $\text{H}_2\text{O}_2$  on the current response of the aptasensor.

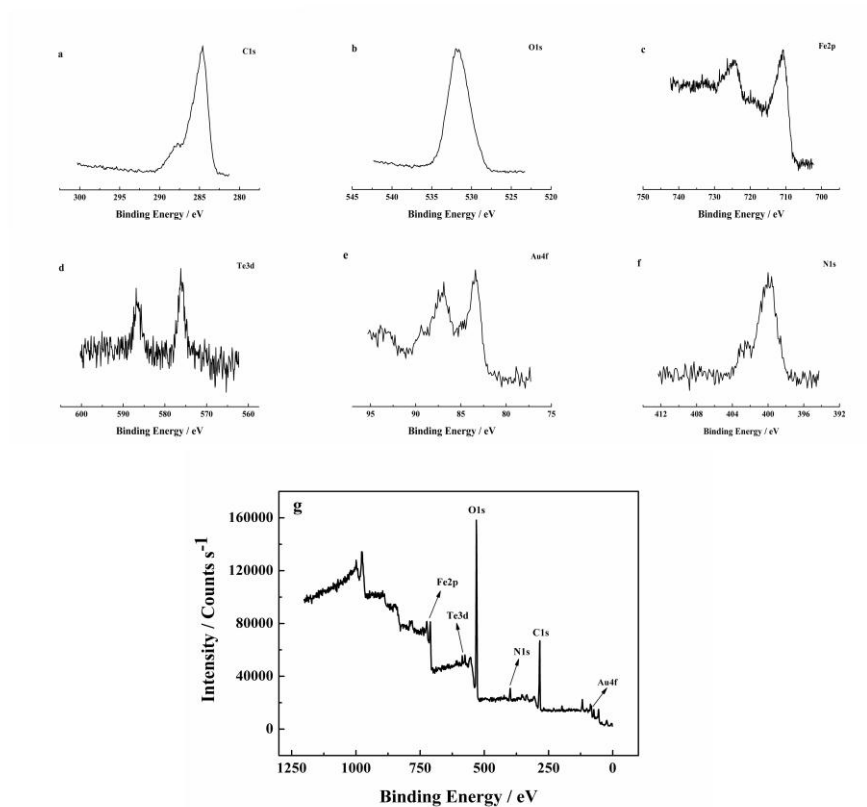

**Fig. S2** XPS analysis of different nanomaterials. (a) and (b) were the C1s and O1s core level spectrum; (c), (d), (e), (f), represented the Fe2p, Te3d, Au4f, N1s core level spectrum of as-prepared Au@FeTe NRs nanocomposite respectively; (g) was the coverage of Au@FeTe NRs nanocomposites.

**Table 1**  
Analytical application of the aptasensor

| Serum samples | Added thrombin /M     | Found Thrombin/M      | Relative standard deviation <sup>a</sup> / % | Recovery / % |
|---------------|-----------------------|-----------------------|----------------------------------------------|--------------|
| 1             | $1.0 \times 10^{-11}$ | $1.1 \times 10^{-11}$ | 4.4                                          | 107.0        |
| 2             | $1.0 \times 10^{-10}$ | $1.1 \times 10^{-10}$ | 5.7                                          | 106.5        |
| 3             | $5.0 \times 10^{-10}$ | $4.8 \times 10^{-10}$ | 4.7                                          | 95.3         |
| 4             | $5.0 \times 10^{-9}$  | $4.6 \times 10^{-9}$  | 7.3                                          | 91.1         |

a. Determination of thrombin added in human blood serum ( $n=3$ ) with the proposed aptasensor.

**Table 2**

Comparisons of proposed aptasensor with other sandwich-type electrochemical aptasensor for thrombin detection.

| Analytical method | Detection limit | Linear range | Ref.     |
|-------------------|-----------------|--------------|----------|
| DPV               | 2 pM            | 0.01~50 nM   | 1        |
| DPV               | 0.34 nM         | 0.001~50 nM  | 2        |
| DPV               | 4.6 nM          | 0.007~70 nM  | 3        |
| DPV               | 0.2 nM          | 0.8~15 nM    | 4        |
| DPV               | 0.06 nM         | 0.1~5 nM     | 5        |
| DPV               | 0.5 pM          | 0.001~20 nM  | Our work |

From the Table 2 we can see that our proposed aptasensor exhibits a much higher sensitivity and wider linear range, which provides a vigorous evidence of our strategy for highly sensitive detection of thrombin.

[1]Y. L. Yuan, X. X Gou, R. Yuan, Y. Q. Chai, Y. Zhuo, L. Mao, X. X. Gan, Biosens. Bioelectron., 2011, 26, 4236.

- [2]Y. Wang, R. Yuan, Y. Q. Chai, Y. L. Yuan, L. J. Bai, Y. H. Liao, *Biosens. Bioelectron.*, 2011, 30, 61.
- [3]H. Fan, H. Li, Q. J. Wang, P. G. He, Y. Z. Fang, *Biosens. Bioelectron.*, 2012, 35, 33.
- [4]J. H. Chen, J. Zhang, J. Li, H. H. Yang, F. F. Fu, G. N. Chen, *Biosens. Bioelectron.*, 2010, 25, 996.
- [5]Y. H. Wang, X. X. He, K. M. Wang, X. Q. Ni, J. Su, Z. F. Chen, *Biosens. Bioelectron.*, 2011, 26, 3536.

Electronic supplementary information (ESI): Optimization of the concentration of  $H_2O_2$  for thrombin detection, analytical application of the aptasensor and XPS analysis of Au@FeTe NRs nanocomposite. This material is available free of charge via the Internet at <http://pubs.acs.org>.
